# Supplementary material
Source: PubMed Central journal article supplement (PMC3158600)
Supplement: supp_JCO.2011.34.7427_Table-A1.pdf [file supp_JCO.2011.34.7427_Table-A1.pdf]

Clinical Activity, Pharmacokinetics, and Pharmacodynamics of the Multikinase Inhibitor Sorafenib in Pediatric Acute Myeloid Leukemia

Inaba, et al

Data Supplement

Table A1. Primary screen of sorafenib and sorafenib N-oxide at 10  $\mu$ M against 442 kinases.

| Compound Name | Ambit Gene Symbol             | Entrez Gene Symbol | Percent Control |
|---------------|-------------------------------|--------------------|-----------------|
| Sorafenib     | AAK1                          | AAK1               | 100             |
| Sorafenib     | ABL1(E255K)-phosphorylated    | ABL1               | 32              |
| Sorafenib     | ABL1(F317I)-nonphosphorylated | ABL1               | 47              |
| Sorafenib     | ABL1(F317I)-phosphorylated    | ABL1               | 25              |
| Sorafenib     | ABL1(F317L)-nonphosphorylated | ABL1               | 2.6             |
| Sorafenib     | ABL1(F317L)-phosphorylated    | ABL1               | 6.6             |
| Sorafenib     | ABL1(H396P)-nonphosphorylated | ABL1               | 0.35            |
| Sorafenib     | ABL1(H396P)-phosphorylated    | ABL1               | 31              |
| Sorafenib     | ABL1(M351T)-phosphorylated    | ABL1               | 14              |
| Sorafenib     | ABL1(Q252H)-nonphosphorylated | ABL1               | 5               |
| Sorafenib     | ABL1(Q252H)-phosphorylated    | ABL1               | 27              |
| Sorafenib     | ABL1(T315I)-nonphosphorylated | ABL1               | 3.2             |
| Sorafenib     | ABL1(T315I)-phosphorylated    | ABL1               | 18              |
| Sorafenib     | ABL1(Y253F)-phosphorylated    | ABL1               | 26              |
| Sorafenib     | ABL1-nonphosphorylated        | ABL1               | 0.3             |
| Sorafenib     | ABL1-phosphorylated           | ABL1               | 16              |
| Sorafenib     | ABL2                          | ABL2               | 26              |
| Sorafenib     | ACVR1                         | ACVR1              | 100             |
| Sorafenib     | ACVR1B                        | ACVR1B             | 56              |
| Sorafenib     | ACVR2A                        | ACVR2A             | 100             |
| Sorafenib     | ACVR2B                        | ACVR2B             | 68              |
| Sorafenib     | ACVRL1                        | ACVRL1             | 100             |
| Sorafenib     | ADCK3                         | CABC1              | 90              |
| Sorafenib     | ADCK4                         | ADCK4              | 90              |
| Sorafenib     | AKT1                          | AKT1               | 100             |
| Sorafenib     | AKT2                          | AKT2               | 86              |
| Sorafenib     | AKT3                          | AKT3               | 90              |
| Sorafenib     | ALK                           | ALK                | 100             |
| Sorafenib     | AMPK-alpha1                   | PRKAA1             | 32              |
| Sorafenib     | AMPK-alpha2                   | PRKAA2             | 60              |
| Sorafenib     | ANKK1                         | ANKK1              | 94              |
| Sorafenib     | ARK5                          | NUAK1              | 74              |
| Sorafenib     | ASK1                          | MAP3K5             | 100             |
| Sorafenib     | ASK2                          | MAP3K6             | 72              |
| Sorafenib     | AURKA                         | AURKA              | 83              |
| Sorafenib     | AURKB                         | AURKB              | 0               |
| Sorafenib     | AURKC                         | AURKC              | 12              |
| Sorafenib     | AXL                           | AXL                | 5.4             |
| Sorafenib     | BIKE                          | BMP2K              | 65              |
| Sorafenib     | BLK                           | BLK                | 28              |
| Sorafenib     | BMPR1A                        | BMPR1A             | 100             |
| Sorafenib     | BMPR1B                        | BMPR1B             | 93              |
| Sorafenib     | BMPR2                         | BMPR2              | 100             |
| Sorafenib     | BMX                           | BMX                | 94              |
| Sorafenib     | BRAF                          | BRAF               | 0.65            |
| Sorafenib     | BRAF(V600E)                   | BRAF               | 0.2             |
| Sorafenib     | BRK                           | PTK6               | 93              |

|           |               |          |      |
|-----------|---------------|----------|------|
| Sorafenib | BRSK1         | BRSK1    | 100  |
| Sorafenib | BRSK2         | BRSK2    | 98   |
| Sorafenib | BTK           | BTK      | 62   |
| Sorafenib | CAMK1         | CAMK1    | 87   |
| Sorafenib | CAMK1D        | CAMK1D   | 88   |
| Sorafenib | CAMK1G        | CAMK1G   | 87   |
| Sorafenib | CAMK2A        | CAMK2A   | 93   |
| Sorafenib | CAMK2B        | CAMK2B   | 96   |
| Sorafenib | CAMK2D        | CAMK2D   | 89   |
| Sorafenib | CAMK2G        | CAMK2G   | 100  |
| Sorafenib | CAMK4         | CAMK4    | 42   |
| Sorafenib | CAMKK1        | CAMKK1   | 100  |
| Sorafenib | CAMKK2        | CAMKK2   | 100  |
| Sorafenib | CASK          | CASK     | 100  |
| Sorafenib | CDC2L1        | CDC2L1   | 93   |
| Sorafenib | CDC2L2        | CDC2L2   | 77   |
| Sorafenib | CDC2L5        | CDC2L5   | 98   |
| Sorafenib | CDK11         | CDC2L6   | 0.7  |
| Sorafenib | CDK2          | CDK2     | 15   |
| Sorafenib | CDK3          | CDK3     | 41   |
| Sorafenib | CDK4-cyclinD1 | CDK4     | 66   |
| Sorafenib | CDK4-cyclinD3 | CDK4     | 100  |
| Sorafenib | CDK5          | CDK5     | 22   |
| Sorafenib | CDK7          | CDK7     | 3.2  |
| Sorafenib | CDK8          | CDK8     | 4.4  |
| Sorafenib | CDK9          | CDK9     | 62   |
| Sorafenib | CDKL1         | CDKL1    | 75   |
| Sorafenib | CDKL2         | CDKL2    | 0.05 |
| Sorafenib | CDKL3         | CDKL3    | 0.35 |
| Sorafenib | CDKL5         | CDKL5    | 67   |
| Sorafenib | CHEK1         | CHEK1    | 49   |
| Sorafenib | CHEK2         | CHEK2    | 63   |
| Sorafenib | CIT           | CIT      | 20   |
| Sorafenib | CLK1          | CLK1     | 29   |
| Sorafenib | CLK2          | CLK2     | 94   |
| Sorafenib | CLK3          | CLK3     | 84   |
| Sorafenib | CLK4          | CLK4     | 30   |
| Sorafenib | CSF1R         | CSF1R    | 0    |
| Sorafenib | CSK           | CSK      | 52   |
| Sorafenib | CSNK1A1       | CSNK1A1  | 100  |
| Sorafenib | CSNK1A1L      | CSNK1A1L | 100  |
| Sorafenib | CSNK1D        | CSNK1D   | 84   |
| Sorafenib | CSNK1E        | CSNK1E   | 99   |
| Sorafenib | CSNK1G1       | CSNK1G1  | 100  |
| Sorafenib | CSNK1G2       | CSNK1G2  | 100  |
| Sorafenib | CSNK1G3       | CSNK1G3  | 100  |
| Sorafenib | CSNK2A1       | CSNK2A1  | 100  |
| Sorafenib | CSNK2A2       | CSNK2A2  | 82   |
| Sorafenib | CTK           | MATK     | 64   |
| Sorafenib | DAPK1         | DAPK1    | 95   |
| Sorafenib | DAPK2         | DAPK2    | 100  |
| Sorafenib | DAPK3         | DAPK3    | 94   |

|           |                           |          |     |
|-----------|---------------------------|----------|-----|
| Sorafenib | DCAMKL1                   | DCLK1    | 62  |
| Sorafenib | DCAMKL2                   | DCLK2    | 95  |
| Sorafenib | DCAMKL3                   | DCLK3    | 100 |
| Sorafenib | DDR1                      | DDR1     | 0   |
| Sorafenib | DDR2                      | DDR2     | 13  |
| Sorafenib | DLK                       | MAP3K12  | 100 |
| Sorafenib | DMPK                      | DMPK     | 90  |
| Sorafenib | DMPK2                     | CDC42BPG | 84  |
| Sorafenib | DRAK1                     | STK17A   | 58  |
| Sorafenib | DRAK2                     | STK17B   | 66  |
| Sorafenib | DYRK1A                    | DYRK1A   | 100 |
| Sorafenib | DYRK1B                    | DYRK1B   | 67  |
| Sorafenib | DYRK2                     | DYRK2    | 60  |
| Sorafenib | EGFR                      | EGFR     | 79  |
| Sorafenib | EGFR(E746-A750del)        | EGFR     | 88  |
| Sorafenib | EGFR(G719C)               | EGFR     | 84  |
| Sorafenib | EGFR(G719S)               | EGFR     | 98  |
| Sorafenib | EGFR(L747-E749del, A750P) | EGFR     | 69  |
| Sorafenib | EGFR(L747-S752del, P753S) | EGFR     | 80  |
| Sorafenib | EGFR(L747-T751del,Sins)   | EGFR     | 90  |
| Sorafenib | EGFR(L858R)               | EGFR     | 92  |
| Sorafenib | EGFR(L858R,T790M)         | EGFR     | 91  |
| Sorafenib | EGFR(L861Q)               | EGFR     | 74  |
| Sorafenib | EGFR(S752-I759del)        | EGFR     | 89  |
| Sorafenib | EGFR(T790M)               | EGFR     | 100 |
| Sorafenib | EIF2AK1                   | EIF2AK1  | 100 |
| Sorafenib | EPHA1                     | EPHA1    | 11  |
| Sorafenib | EPHA2                     | EPHA2    | 9   |
| Sorafenib | EPHA3                     | EPHA3    | 4   |
| Sorafenib | EPHA4                     | EPHA4    | 15  |
| Sorafenib | EPHA5                     | EPHA5    | 16  |
| Sorafenib | EPHA6                     | EPHA6    | 1.6 |
| Sorafenib | EPHA7                     | EPHA7    | 7.6 |
| Sorafenib | EPHA8                     | EPHA8    | 0.9 |
| Sorafenib | EPHB1                     | EPHB1    | 18  |
| Sorafenib | EPHB2                     | EPHB2    | 12  |
| Sorafenib | EPHB3                     | EPHB3    | 53  |
| Sorafenib | EPHB4                     | EPHB4    | 8.6 |
| Sorafenib | EPHB6                     | EPHB6    | 2.4 |
| Sorafenib | ERBB2                     | ERBB2    | 100 |
| Sorafenib | ERBB3                     | ERBB3    | 70  |
| Sorafenib | ERBB4                     | ERBB4    | 92  |
| Sorafenib | ERK1                      | MAPK3    | 95  |
| Sorafenib | ERK2                      | MAPK1    | 100 |
| Sorafenib | ERK3                      | MAPK6    | 94  |
| Sorafenib | ERK4                      | MAPK4    | 79  |
| Sorafenib | ERK5                      | MAPK7    | 81  |
| Sorafenib | ERK8                      | MAPK15   | 1.1 |
| Sorafenib | ERN1                      | ERN1     | 92  |
| Sorafenib | FAK                       | PTK2     | 100 |
| Sorafenib | FER                       | FER      | 77  |
| Sorafenib | FES                       | FES      | 72  |

|           |                              |         |      |
|-----------|------------------------------|---------|------|
| Sorafenib | FGFR1                        | FGFR1   | 3.4  |
| Sorafenib | FGFR2                        | FGFR2   | 6.4  |
| Sorafenib | FGFR3                        | FGFR3   | 20   |
| Sorafenib | FGFR3(G697C)                 | FGFR3   | 25   |
| Sorafenib | FGFR4                        | FGFR4   | 43   |
| Sorafenib | FGR                          | FGR     | 41   |
| Sorafenib | FLT1                         | FLT1    | 0.7  |
| Sorafenib | FLT3                         | FLT3    | 0.05 |
| Sorafenib | FLT3(D835H)                  | FLT3    | 0.45 |
| Sorafenib | FLT3(D835Y)                  | FLT3    | 1.6  |
| Sorafenib | FLT3(ITD)                    | FLT3    | 0.5  |
| Sorafenib | FLT3(K663Q)                  | FLT3    | 0.25 |
| Sorafenib | FLT3(N841I)                  | FLT3    | 0    |
| Sorafenib | FLT3(R834Q)                  | FLT3    | 12   |
| Sorafenib | FLT4                         | FLT4    | 0    |
| Sorafenib | FRK                          | FRK     | 2.2  |
| Sorafenib | FYN                          | FYN     | 35   |
| Sorafenib | GAK                          | GAK     | 62   |
| Sorafenib | GCN2(Kin.Dom.2,S808G)        | EIF2AK4 | 60   |
| Sorafenib | GRK1                         | GRK1    | 100  |
| Sorafenib | GRK4                         | GRK4    | 99   |
| Sorafenib | GRK7                         | GRK7    | 100  |
| Sorafenib | GSK3A                        | GSK3A   | 100  |
| Sorafenib | GSK3B                        | GSK3B   | 92   |
| Sorafenib | HCK                          | HCK     | 14   |
| Sorafenib | HIPK1                        | HIPK1   | 17   |
| Sorafenib | HIPK2                        | HIPK2   | 3.6  |
| Sorafenib | HIPK3                        | HIPK3   | 1.2  |
| Sorafenib | HIPK4                        | HIPK4   | 4.5  |
| Sorafenib | HPK1                         | MAP4K1  | 19   |
| Sorafenib | HUNK                         | HUNK    | 90   |
| Sorafenib | ICK                          | ICK     | 100  |
| Sorafenib | IGF1R                        | IGF1R   | 100  |
| Sorafenib | IKK-alpha                    | CHUK    | 93   |
| Sorafenib | IKK-beta                     | IKBKB   | 100  |
| Sorafenib | IKK-epsilon                  | IKBKE   | 100  |
| Sorafenib | INSR                         | INSR    | 100  |
| Sorafenib | INSRR                        | INSRR   | 86   |
| Sorafenib | IRAK1                        | IRAK1   | 76   |
| Sorafenib | IRAK3                        | IRAK3   | 76   |
| Sorafenib | IRAK4                        | IRAK4   | 100  |
| Sorafenib | ITK                          | ITK     | 100  |
| Sorafenib | JAK1(JH1domain-catalytic)    | JAK1    | 42   |
| Sorafenib | JAK1(JH2domain-pseudokinase) | JAK1    | 97   |
| Sorafenib | JAK2(JH1domain-catalytic)    | JAK2    | 70   |
| Sorafenib | JAK3(JH1domain-catalytic)    | JAK3    | 100  |
| Sorafenib | JNK1                         | MAPK8   | 88   |
| Sorafenib | JNK2                         | MAPK9   | 21   |
| Sorafenib | JNK3                         | MAPK10  | 90   |
| Sorafenib | KIT                          | KIT     | 0    |
| Sorafenib | KIT(A829P)                   | KIT     | 55   |
| Sorafenib | KIT(D816H)                   | KIT     | 24   |

|           |                  |          |      |
|-----------|------------------|----------|------|
| Sorafenib | KIT(D816V)       | KIT      | 1.4  |
| Sorafenib | KIT(L576P)       | KIT      | 0    |
| Sorafenib | KIT(V559D)       | KIT      | 0    |
| Sorafenib | KIT(V559D,T670I) | KIT      | 0    |
| Sorafenib | KIT(V559D,V654A) | KIT      | 0.45 |
| Sorafenib | LATS1            | LATS1    | 79   |
| Sorafenib | LATS2            | LATS2    | 100  |
| Sorafenib | LCK              | LCK      | 3.3  |
| Sorafenib | LIMK1            | LIMK1    | 7.6  |
| Sorafenib | LIMK2            | LIMK2    | 53   |
| Sorafenib | LKB1             | STK11    | 98   |
| Sorafenib | LOK              | STK10    | 0    |
| Sorafenib | LRRK2            | LRRK2    | 86   |
| Sorafenib | LRRK2(G2019S)    | LRRK2    | 62   |
| Sorafenib | LTK              | LTK      | 76   |
| Sorafenib | LYN              | LYN      | 11   |
| Sorafenib | LZK              | MAP3K13  | 88   |
| Sorafenib | MAK              | MAK      | 38   |
| Sorafenib | MAP3K1           | MAP3K1   | 89   |
| Sorafenib | MAP3K15          | MAP3K15  | 79   |
| Sorafenib | MAP3K2           | MAP3K2   | 100  |
| Sorafenib | MAP3K3           | MAP3K3   | 97   |
| Sorafenib | MAP3K4           | MAP3K4   | 94   |
| Sorafenib | MAP4K2           | MAP4K2   | 93   |
| Sorafenib | MAP4K3           | MAP4K3   | 48   |
| Sorafenib | MAP4K4           | MAP4K4   | 8.7  |
| Sorafenib | MAP4K5           | MAP4K5   | 1.5  |
| Sorafenib | MAPKAPK2         | MAPKAPK2 | 91   |
| Sorafenib | MAPKAPK5         | MAPKAPK5 | 100  |
| Sorafenib | MARK1            | MARK1    | 90   |
| Sorafenib | MARK2            | MARK2    | 67   |
| Sorafenib | MARK3            | MARK3    | 86   |
| Sorafenib | MARK4            | MARK4    | 93   |
| Sorafenib | MAST1            | MAST1    | 100  |
| Sorafenib | MEK1             | MAP2K1   | 95   |
| Sorafenib | MEK2             | MAP2K2   | 88   |
| Sorafenib | MEK3             | MAP2K3   | 93   |
| Sorafenib | MEK4             | MAP2K4   | 85   |
| Sorafenib | MEK5             | MAP2K5   | 0.35 |
| Sorafenib | MEK6             | MAP2K6   | 73   |
| Sorafenib | MELK             | MELK     | 83   |
| Sorafenib | MERTK            | MERTK    | 2.4  |
| Sorafenib | MET              | MET      | 74   |
| Sorafenib | MET(M1250T)      | MET      | 86   |
| Sorafenib | MET(Y1235D)      | MET      | 60   |
| Sorafenib | MINK             | MINK1    | 80   |
| Sorafenib | MKK7             | MAP2K7   | 92   |
| Sorafenib | MKNK1            | MKNK1    | 1.6  |
| Sorafenib | MKNK2            | MKNK2    | 0.1  |
| Sorafenib | MLCK             | MYLK3    | 40   |
| Sorafenib | MLK1             | MAP3K9   | 100  |
| Sorafenib | MLK2             | MAP3K10  | 85   |

|           |                       |             |      |
|-----------|-----------------------|-------------|------|
| Sorafenib | MLK3                  | MAP3K11     | 74   |
| Sorafenib | MRCKA                 | CDC42BPA    | 96   |
| Sorafenib | MRCKB                 | CDC42BPB    | 100  |
| Sorafenib | MST1                  | STK4        | 96   |
| Sorafenib | MST1R                 | MST1R       | 76   |
| Sorafenib | MST2                  | STK3        | 100  |
| Sorafenib | MST3                  | STK24       | 81   |
| Sorafenib | MST4                  | MST4        | 99   |
| Sorafenib | MTOR                  | FRAP1       | 100  |
| Sorafenib | MUSK                  | MUSK        | 0    |
| Sorafenib | MYLK                  | MYLK        | 100  |
| Sorafenib | MYLK2                 | MYLK2       | 22   |
| Sorafenib | MYLK4                 | MYLK4       | 88   |
| Sorafenib | MYO3A                 | MYO3A       | 44   |
| Sorafenib | MYO3B                 | MYO3B       | 38   |
| Sorafenib | NDR1                  | STK38       | 100  |
| Sorafenib | NDR2                  | STK38L      | 95   |
| Sorafenib | NEK1                  | NEK1        | 94   |
| Sorafenib | NEK11                 | NEK11       | 99   |
| Sorafenib | NEK2                  | NEK2        | 90   |
| Sorafenib | NEK3                  | NEK3        | 100  |
| Sorafenib | NEK4                  | NEK4        | 100  |
| Sorafenib | NEK5                  | NEK5        | 100  |
| Sorafenib | NEK6                  | NEK6        | 100  |
| Sorafenib | NEK7                  | NEK7        | 100  |
| Sorafenib | NEK9                  | NEK9        | 48   |
| Sorafenib | NIM1                  | MGC42105    | 100  |
| Sorafenib | NLK                   | NLK         | 19   |
| Sorafenib | OSR1                  | OXR1        | 100  |
| Sorafenib | p38-alpha             | MAPK14      | 0.1  |
| Sorafenib | p38-beta              | MAPK11      | 0.05 |
| Sorafenib | p38-delta             | MAPK13      | 21   |
| Sorafenib | p38-gamma             | MAPK12      | 42   |
| Sorafenib | PAK1                  | PAK1        | 100  |
| Sorafenib | PAK2                  | PAK2        | 95   |
| Sorafenib | PAK3                  | PAK3        | 56   |
| Sorafenib | PAK4                  | PAK4        | 100  |
| Sorafenib | PAK6                  | PAK6        | 86   |
| Sorafenib | PAK7                  | PAK7        | 100  |
| Sorafenib | PCK1                  | PCK1        | 68   |
| Sorafenib | PCK2                  | PCK2        | 13   |
| Sorafenib | PCK3                  | PCK3        | 57   |
| Sorafenib | PDGFRA                | PDGFRA      | 0    |
| Sorafenib | PDGFRB                | PDGFRB      | 0    |
| Sorafenib | PDPK1                 | PDPK1       | 94   |
| Sorafenib | PFCDPK1(P.falciparum) | PFB0815w    | 0.8  |
| Sorafenib | PFPK5(P.falciparum)   | MAL13P1.279 | 59   |
| Sorafenib | PFTAIRE2              | PFTK2       | 7.4  |
| Sorafenib | PFTK1                 | PFTK1       | 3.1  |
| Sorafenib | PHKG1                 | PHKG1       | 73   |
| Sorafenib | PHKG2                 | PHKG2       | 100  |
| Sorafenib | PIK3C2B               | PIK3C2B     | 100  |

|           |                      |          |     |
|-----------|----------------------|----------|-----|
| Sorafenib | PIK3C2G              | PIK3C2G  | 100 |
| Sorafenib | PIK3CA               | PIK3CA   | 100 |
| Sorafenib | PIK3CA(C420R)        | PIK3CA   | 44  |
| Sorafenib | PIK3CA(E542K)        | PIK3CA   | 100 |
| Sorafenib | PIK3CA(E545A)        | PIK3CA   | 100 |
| Sorafenib | PIK3CA(E545K)        | PIK3CA   | 100 |
| Sorafenib | PIK3CA(H1047L)       | PIK3CA   | 97  |
| Sorafenib | PIK3CA(H1047Y)       | PIK3CA   | 100 |
| Sorafenib | PIK3CA(I800L)        | PIK3CA   | 100 |
| Sorafenib | PIK3CA(M1043I)       | PIK3CA   | 88  |
| Sorafenib | PIK3CA(Q546K)        | PIK3CA   | 100 |
| Sorafenib | PIK3CB               | PIK3CB   | 100 |
| Sorafenib | PIK3CD               | PIK3CD   | 100 |
| Sorafenib | PIK3CG               | PIK3CG   | 95  |
| Sorafenib | PIK4CB               | PI4KB    | 100 |
| Sorafenib | PIM1                 | PIM1     | 100 |
| Sorafenib | PIM2                 | PIM2     | 89  |
| Sorafenib | PIM3                 | PIM3     | 100 |
| Sorafenib | PIP5K1A              | PIP5K1A  | 100 |
| Sorafenib | PIP5K1C              | PIP5K1C  | 79  |
| Sorafenib | PIP5K2B              | PIP4K2B  | 89  |
| Sorafenib | PIP5K2C              | PIP4K2C  | 34  |
| Sorafenib | PKAC-alpha           | PRKACA   | 100 |
| Sorafenib | PKAC-beta            | PRKACB   | 100 |
| Sorafenib | PKMYT1               | PKMYT1   | 93  |
| Sorafenib | PKN1                 | PKN1     | 100 |
| Sorafenib | PKN2                 | PKN2     | 100 |
| Sorafenib | PKNB(M.tuberculosis) | pknB     | 100 |
| Sorafenib | PLK1                 | PLK1     | 100 |
| Sorafenib | PLK2                 | PLK2     | 100 |
| Sorafenib | PLK3                 | PLK3     | 100 |
| Sorafenib | PLK4                 | PLK4     | 46  |
| Sorafenib | PRKCD                | PRKCD    | 100 |
| Sorafenib | PRKCE                | PRKCE    | 100 |
| Sorafenib | PRKCH                | PRKCH    | 89  |
| Sorafenib | PRKCI                | PRKCI    | 100 |
| Sorafenib | PRKCQ                | PRKCQ    | 76  |
| Sorafenib | PRKD1                | PRKD1    | 100 |
| Sorafenib | PRKD2                | PRKD2    | 100 |
| Sorafenib | PRKD3                | PRKD3    | 70  |
| Sorafenib | PRKG1                | PRKG1    | 100 |
| Sorafenib | PRKG2                | PRKG2    | 100 |
| Sorafenib | PRKR                 | EIF2AK2  | 74  |
| Sorafenib | PRKX                 | PRKX     | 98  |
| Sorafenib | PRP4                 | PRPF4B   | 94  |
| Sorafenib | PYK2                 | PTK2B    | 99  |
| Sorafenib | QSK                  | KIAA0999 | 100 |
| Sorafenib | RAF1                 | RAF1     | 0.7 |
| Sorafenib | RET                  | RET      | 0   |
| Sorafenib | RET(M918T)           | RET      | 0   |
| Sorafenib | RET(V804L)           | RET      | 0   |
| Sorafenib | RET(V804M)           | RET      | 0   |

|           |                               |         |      |
|-----------|-------------------------------|---------|------|
| Sorafenib | RIOK1                         | RIOK1   | 100  |
| Sorafenib | RIOK2                         | RIOK2   | 48   |
| Sorafenib | RIOK3                         | RIOK3   | 88   |
| Sorafenib | RIPK1                         | RIPK1   | 88   |
| Sorafenib | RIPK2                         | RIPK2   | 5.3  |
| Sorafenib | RIPK4                         | RIPK4   | 100  |
| Sorafenib | RIPK5                         | DSTKY   | 100  |
| Sorafenib | ROCK1                         | ROCK1   | 84   |
| Sorafenib | ROCK2                         | ROCK2   | 90   |
| Sorafenib | ROS1                          | ROS1    | 79   |
| Sorafenib | RPS6KA4(Kin.Dom.1-N-terminal) | RPS6KA4 | 81   |
| Sorafenib | RPS6KA4(Kin.Dom.2-C-terminal) | RPS6KA4 | 100  |
| Sorafenib | RPS6KA5(Kin.Dom.1-N-terminal) | RPS6KA5 | 77   |
| Sorafenib | RPS6KA5(Kin.Dom.2-C-terminal) | RPS6KA5 | 81   |
| Sorafenib | RSK1(Kin.Dom.1-N-terminal)    | RPS6KA1 | 84   |
| Sorafenib | RSK1(Kin.Dom.2-C-terminal)    | RPS6KA1 | 77   |
| Sorafenib | RSK2(Kin.Dom.1-N-terminal)    | RPS6KA3 | 99   |
| Sorafenib | RSK3(Kin.Dom.1-N-terminal)    | RPS6KA2 | 61   |
| Sorafenib | RSK3(Kin.Dom.2-C-terminal)    | RPS6KA2 | 59   |
| Sorafenib | RSK4(Kin.Dom.1-N-terminal)    | RPS6KA6 | 100  |
| Sorafenib | RSK4(Kin.Dom.2-C-terminal)    | RPS6KA6 | 16   |
| Sorafenib | S6K1                          | RPS6KB1 | 46   |
| Sorafenib | SBK1                          | SBK1    | 100  |
| Sorafenib | SgK110                        | SgK110  | 91   |
| Sorafenib | SGK3                          | SGK3    | 72   |
| Sorafenib | SIK                           | SIK1    | 79   |
| Sorafenib | SIK2                          | SIK2    | 74   |
| Sorafenib | SLK                           | SLK     | 9.2  |
| Sorafenib | SNARK                         | NUAK2   | 100  |
| Sorafenib | SNRK                          | SNRK    | 100  |
| Sorafenib | SRC                           | SRC     | 17   |
| Sorafenib | SRMS                          | SRMS    | 96   |
| Sorafenib | SRPK1                         | SRPK1   | 100  |
| Sorafenib | SRPK2                         | SRPK2   | 100  |
| Sorafenib | SRPK3                         | SRPK3   | 84   |
| Sorafenib | STK16                         | STK16   | 94   |
| Sorafenib | STK33                         | STK33   | 6    |
| Sorafenib | STK35                         | STK35   | 7.8  |
| Sorafenib | STK36                         | STK36   | 16   |
| Sorafenib | STK39                         | STK39   | 76   |
| Sorafenib | SYK                           | SYK     | 77   |
| Sorafenib | TAK1                          | MAP3K7  | 2.6  |
| Sorafenib | TAOK1                         | TAOK1   | 12   |
| Sorafenib | TAOK2                         | TAOK2   | 0.65 |
| Sorafenib | TAOK3                         | TAOK3   | 0.65 |
| Sorafenib | TBK1                          | TBK1    | 100  |
| Sorafenib | TEC                           | TEC     | 100  |
| Sorafenib | TESK1                         | TESK1   | 72   |
| Sorafenib | TGFBR1                        | TGFBR1  | 100  |
| Sorafenib | TGFBR2                        | TGFBR2  | 25   |
| Sorafenib | TIE1                          | TIE1    | 0.25 |
| Sorafenib | TIE2                          | TEK     | 2.8  |



|                   |                               |        |      |
|-------------------|-------------------------------|--------|------|
| Sorafenib         | TLK1                          | TLK1   | 74   |
| Sorafenib         | TLK2                          | TLK2   | 99   |
| Sorafenib         | TNIK                          | TNIK   | 21   |
| Sorafenib         | TNK1                          | TNK1   | 14   |
| Sorafenib         | TNK2                          | TNK2   | 99   |
| Sorafenib         | TNNI3K                        | TNNI3K | 2.4  |
| Sorafenib         | TRKA                          | NTRK1  | 22   |
| Sorafenib         | TRKB                          | NTRK2  | 6.1  |
| Sorafenib         | TRKC                          | NTRK3  | 1.1  |
| Sorafenib         | TRPM6                         | TRPM6  | 100  |
| Sorafenib         | TSSK1B                        | TSSK1B | 98   |
| Sorafenib         | TTK                           | TTK    | 15   |
| Sorafenib         | TXK                           | TXK    | 98   |
| Sorafenib         | TYK2(JH1domain-catalytic)     | TYK2   | 100  |
| Sorafenib         | TYK2(JH2domain-pseudokinase)  | TYK2   | 93   |
| Sorafenib         | TYRO3                         | TYRO3  | 100  |
| Sorafenib         | ULK1                          | ULK1   | 89   |
| Sorafenib         | ULK2                          | ULK2   | 94   |
| Sorafenib         | ULK3                          | ULK3   | 100  |
| Sorafenib         | VEGFR2                        | KDR    | 0.3  |
| Sorafenib         | VRK2                          | VRK2   | 100  |
| Sorafenib         | WEE1                          | WEE1   | 100  |
| Sorafenib         | WEE2                          | WEE2   | 100  |
| Sorafenib         | YANK1                         | STK32A | 100  |
| Sorafenib         | YANK2                         | STK32B | 100  |
| Sorafenib         | YANK3                         | STK32C | 72   |
| Sorafenib         | YES                           | YES1   | 41   |
| Sorafenib         | YSK1                          | STK25  | 100  |
| Sorafenib         | YSK4                          | YSK4   | 0    |
| Sorafenib         | ZAK                           | ZAK    | 0.6  |
| Sorafenib         | ZAP70                         | ZAP70  | 91   |
| Sorafenib N-oxide | AAK1                          | AAK1   | 100  |
| Sorafenib N-oxide | ABL1(E255K)-phosphorylated    | ABL1   | 38   |
| Sorafenib N-oxide | ABL1(F317I)-nonphosphorylated | ABL1   | 52   |
| Sorafenib N-oxide | ABL1(F317I)-phosphorylated    | ABL1   | 34   |
| Sorafenib N-oxide | ABL1(F317L)-nonphosphorylated | ABL1   | 0.15 |
| Sorafenib N-oxide | ABL1(F317L)-phosphorylated    | ABL1   | 26   |
| Sorafenib N-oxide | ABL1(H396P)-nonphosphorylated | ABL1   | 0.7  |
| Sorafenib N-oxide | ABL1(H396P)-phosphorylated    | ABL1   | 46   |
| Sorafenib N-oxide | ABL1(M351T)-phosphorylated    | ABL1   | 21   |
| Sorafenib N-oxide | ABL1(Q252H)-nonphosphorylated | ABL1   | 5.4  |
| Sorafenib N-oxide | ABL1(Q252H)-phosphorylated    | ABL1   | 35   |
| Sorafenib N-oxide | ABL1(T315I)-nonphosphorylated | ABL1   | 4    |
| Sorafenib N-oxide | ABL1(T315I)-phosphorylated    | ABL1   | 16   |
| Sorafenib N-oxide | ABL1(Y253F)-phosphorylated    | ABL1   | 30   |
| Sorafenib N-oxide | ABL1-nonphosphorylated        | ABL1   | 0.15 |
| Sorafenib N-oxide | ABL1-phosphorylated           | ABL1   | 18   |
| Sorafenib N-oxide | ABL2                          | ABL2   | 25   |
| Sorafenib N-oxide | ACVR1                         | ACVR1  | 100  |
| Sorafenib N-oxide | ACVR1B                        | ACVR1B | 44   |
| Sorafenib N-oxide | ACVR2A                        | ACVR2A | 89   |
| Sorafenib N-oxide | ACVR2B                        | ACVR2B | 22   |

|                   |               |        |      |
|-------------------|---------------|--------|------|
| Sorafenib N-oxide | ACVRL1        | ACVRL1 | 96   |
| Sorafenib N-oxide | ADCK3         | CABC1  | 86   |
| Sorafenib N-oxide | ADCK4         | ADCK4  | 81   |
| Sorafenib N-oxide | AKT1          | AKT1   | 100  |
| Sorafenib N-oxide | AKT2          | AKT2   | 88   |
| Sorafenib N-oxide | AKT3          | AKT3   | 93   |
| Sorafenib N-oxide | ALK           | ALK    | 94   |
| Sorafenib N-oxide | AMPK-alpha1   | PRKAA1 | 36   |
| Sorafenib N-oxide | AMPK-alpha2   | PRKAA2 | 49   |
| Sorafenib N-oxide | ANKK1         | ANKK1  | 58   |
| Sorafenib N-oxide | ARK5          | NUAK1  | 100  |
| Sorafenib N-oxide | ASK1          | MAP3K5 | 89   |
| Sorafenib N-oxide | ASK2          | MAP3K6 | 64   |
| Sorafenib N-oxide | AURKA         | AURKA  | 26   |
| Sorafenib N-oxide | AURKB         | AURKB  | 0    |
| Sorafenib N-oxide | AURKC         | AURKC  | 15   |
| Sorafenib N-oxide | AXL           | AXL    | 1.8  |
| Sorafenib N-oxide | BIKE          | BMP2K  | 100  |
| Sorafenib N-oxide | BLK           | BLK    | 11   |
| Sorafenib N-oxide | BMPR1A        | BMPR1A | 91   |
| Sorafenib N-oxide | BMPR1B        | BMPR1B | 81   |
| Sorafenib N-oxide | BMPR2         | BMPR2  | 98   |
| Sorafenib N-oxide | BMX           | BMX    | 67   |
| Sorafenib N-oxide | BRAF          | BRAF   | 1.9  |
| Sorafenib N-oxide | BRAF(V600E)   | BRAF   | 0.1  |
| Sorafenib N-oxide | BRK           | PTK6   | 100  |
| Sorafenib N-oxide | BRSK1         | BRSK1  | 76   |
| Sorafenib N-oxide | BRSK2         | BRSK2  | 100  |
| Sorafenib N-oxide | BTK           | BTK    | 30   |
| Sorafenib N-oxide | CAMK1         | CAMK1  | 58   |
| Sorafenib N-oxide | CAMK1D        | CAMK1D | 75   |
| Sorafenib N-oxide | CAMK1G        | CAMK1G | 76   |
| Sorafenib N-oxide | CAMK2A        | CAMK2A | 96   |
| Sorafenib N-oxide | CAMK2B        | CAMK2B | 89   |
| Sorafenib N-oxide | CAMK2D        | CAMK2D | 87   |
| Sorafenib N-oxide | CAMK2G        | CAMK2G | 96   |
| Sorafenib N-oxide | CAMK4         | CAMK4  | 54   |
| Sorafenib N-oxide | CAMKK1        | CAMKK1 | 79   |
| Sorafenib N-oxide | CAMKK2        | CAMKK2 | 68   |
| Sorafenib N-oxide | CASK          | CASK   | 100  |
| Sorafenib N-oxide | CDC2L1        | CDC2L1 | 100  |
| Sorafenib N-oxide | CDC2L2        | CDC2L2 | 99   |
| Sorafenib N-oxide | CDC2L5        | CDC2L5 | 40   |
| Sorafenib N-oxide | CDK11         | CDC2L6 | 0.35 |
| Sorafenib N-oxide | CDK2          | CDK2   | 1.8  |
| Sorafenib N-oxide | CDK3          | CDK3   | 13   |
| Sorafenib N-oxide | CDK4-cyclinD1 | CDK4   | 74   |
| Sorafenib N-oxide | CDK4-cyclinD3 | CDK4   | 62   |
| Sorafenib N-oxide | CDK5          | CDK5   | 12   |
| Sorafenib N-oxide | CDK7          | CDK7   | 5    |
| Sorafenib N-oxide | CDK8          | CDK8   | 0.6  |
| Sorafenib N-oxide | CDK9          | CDK9   | 73   |

|                   |                           |          |      |
|-------------------|---------------------------|----------|------|
| Sorafenib N-oxide | CDKL1                     | CDKL1    | 45   |
| Sorafenib N-oxide | CDKL2                     | CDKL2    | 0.1  |
| Sorafenib N-oxide | CDKL3                     | CDKL3    | 0.3  |
| Sorafenib N-oxide | CDKL5                     | CDKL5    | 27   |
| Sorafenib N-oxide | CHEK1                     | CHEK1    | 79   |
| Sorafenib N-oxide | CHEK2                     | CHEK2    | 21   |
| Sorafenib N-oxide | CIT                       | CIT      | 27   |
| Sorafenib N-oxide | CLK1                      | CLK1     | 46   |
| Sorafenib N-oxide | CLK2                      | CLK2     | 80   |
| Sorafenib N-oxide | CLK3                      | CLK3     | 100  |
| Sorafenib N-oxide | CLK4                      | CLK4     | 47   |
| Sorafenib N-oxide | CSF1R                     | CSF1R    | 0    |
| Sorafenib N-oxide | CSK                       | CSK      | 1    |
| Sorafenib N-oxide | CSNK1A1                   | CSNK1A1  | 100  |
| Sorafenib N-oxide | CSNK1A1L                  | CSNK1A1L | 100  |
| Sorafenib N-oxide | CSNK1D                    | CSNK1D   | 91   |
| Sorafenib N-oxide | CSNK1E                    | CSNK1E   | 100  |
| Sorafenib N-oxide | CSNK1G1                   | CSNK1G1  | 96   |
| Sorafenib N-oxide | CSNK1G2                   | CSNK1G2  | 100  |
| Sorafenib N-oxide | CSNK1G3                   | CSNK1G3  | 96   |
| Sorafenib N-oxide | CSNK2A1                   | CSNK2A1  | 94   |
| Sorafenib N-oxide | CSNK2A2                   | CSNK2A2  | 70   |
| Sorafenib N-oxide | CTK                       | MATK     | 62   |
| Sorafenib N-oxide | DAPK1                     | DAPK1    | 85   |
| Sorafenib N-oxide | DAPK2                     | DAPK2    | 100  |
| Sorafenib N-oxide | DAPK3                     | DAPK3    | 100  |
| Sorafenib N-oxide | DCAMKL1                   | DCLK1    | 53   |
| Sorafenib N-oxide | DCAMKL2                   | DCLK2    | 87   |
| Sorafenib N-oxide | DCAMKL3                   | DCLK3    | 100  |
| Sorafenib N-oxide | DDR1                      | DDR1     | 0.05 |
| Sorafenib N-oxide | DDR2                      | DDR2     | 19   |
| Sorafenib N-oxide | DLK                       | MAP3K12  | 100  |
| Sorafenib N-oxide | DMPK                      | DMPK     | 91   |
| Sorafenib N-oxide | DMPK2                     | CDC42BPG | 86   |
| Sorafenib N-oxide | DRAK1                     | STK17A   | 66   |
| Sorafenib N-oxide | DRAK2                     | STK17B   | 62   |
| Sorafenib N-oxide | DYRK1A                    | DYRK1A   | 95   |
| Sorafenib N-oxide | DYRK1B                    | DYRK1B   | 69   |
| Sorafenib N-oxide | DYRK2                     | DYRK2    | 26   |
| Sorafenib N-oxide | EGFR                      | EGFR     | 75   |
| Sorafenib N-oxide | EGFR(E746-A750del)        | EGFR     | 84   |
| Sorafenib N-oxide | EGFR(G719C)               | EGFR     | 80   |
| Sorafenib N-oxide | EGFR(G719S)               | EGFR     | 100  |
| Sorafenib N-oxide | EGFR(L747-E749del, A750P) | EGFR     | 70   |
| Sorafenib N-oxide | EGFR(L747-S752del, P753S) | EGFR     | 77   |
| Sorafenib N-oxide | EGFR(L747-T751del,Sins)   | EGFR     | 76   |
| Sorafenib N-oxide | EGFR(L858R)               | EGFR     | 88   |
| Sorafenib N-oxide | EGFR(L858R,T790M)         | EGFR     | 82   |
| Sorafenib N-oxide | EGFR(L861Q)               | EGFR     | 74   |
| Sorafenib N-oxide | EGFR(S752-I759del)        | EGFR     | 96   |
| Sorafenib N-oxide | EGFR(T790M)               | EGFR     | 100  |
| Sorafenib N-oxide | EIF2AK1                   | EIF2AK1  | 100  |

|                   |                       |         |      |
|-------------------|-----------------------|---------|------|
| Sorafenib N-oxide | EPHA1                 | EPHA1   | 18   |
| Sorafenib N-oxide | EPHA2                 | EPHA2   | 4.7  |
| Sorafenib N-oxide | EPHA3                 | EPHA3   | 4    |
| Sorafenib N-oxide | EPHA4                 | EPHA4   | 13   |
| Sorafenib N-oxide | EPHA5                 | EPHA5   | 15   |
| Sorafenib N-oxide | EPHA6                 | EPHA6   | 6.6  |
| Sorafenib N-oxide | EPHA7                 | EPHA7   | 33   |
| Sorafenib N-oxide | EPHA8                 | EPHA8   | 0.3  |
| Sorafenib N-oxide | EPHB1                 | EPHB1   | 20   |
| Sorafenib N-oxide | EPHB2                 | EPHB2   | 19   |
| Sorafenib N-oxide | EPHB3                 | EPHB3   | 100  |
| Sorafenib N-oxide | EPHB4                 | EPHB4   | 16   |
| Sorafenib N-oxide | EPHB6                 | EPHB6   | 1.8  |
| Sorafenib N-oxide | ERBB2                 | ERBB2   | 100  |
| Sorafenib N-oxide | ERBB3                 | ERBB3   | 62   |
| Sorafenib N-oxide | ERBB4                 | ERBB4   | 100  |
| Sorafenib N-oxide | ERK1                  | MAPK3   | 92   |
| Sorafenib N-oxide | ERK2                  | MAPK1   | 100  |
| Sorafenib N-oxide | ERK3                  | MAPK6   | 100  |
| Sorafenib N-oxide | ERK4                  | MAPK4   | 78   |
| Sorafenib N-oxide | ERK5                  | MAPK7   | 65   |
| Sorafenib N-oxide | ERK8                  | MAPK15  | 0.6  |
| Sorafenib N-oxide | ERN1                  | ERN1    | 66   |
| Sorafenib N-oxide | FAK                   | PTK2    | 97   |
| Sorafenib N-oxide | FER                   | FER     | 64   |
| Sorafenib N-oxide | FES                   | FES     | 98   |
| Sorafenib N-oxide | FGFR1                 | FGFR1   | 9.7  |
| Sorafenib N-oxide | FGFR2                 | FGFR2   | 8.9  |
| Sorafenib N-oxide | FGFR3                 | FGFR3   | 32   |
| Sorafenib N-oxide | FGFR3(G697C)          | FGFR3   | 50   |
| Sorafenib N-oxide | FGFR4                 | FGFR4   | 39   |
| Sorafenib N-oxide | FGR                   | FGR     | 28   |
| Sorafenib N-oxide | FLT1                  | FLT1    | 0.65 |
| Sorafenib N-oxide | FLT3                  | FLT3    | 0.1  |
| Sorafenib N-oxide | FLT3(D835H)           | FLT3    | 0.7  |
| Sorafenib N-oxide | FLT3(D835Y)           | FLT3    | 2.8  |
| Sorafenib N-oxide | FLT3(ITD)             | FLT3    | 0.4  |
| Sorafenib N-oxide | FLT3(K663Q)           | FLT3    | 0.2  |
| Sorafenib N-oxide | FLT3(N841I)           | FLT3    | 0    |
| Sorafenib N-oxide | FLT3(R834Q)           | FLT3    | 9    |
| Sorafenib N-oxide | FLT4                  | FLT4    | 0    |
| Sorafenib N-oxide | FRK                   | FRK     | 1.8  |
| Sorafenib N-oxide | FYN                   | FYN     | 41   |
| Sorafenib N-oxide | GAK                   | GAK     | 70   |
| Sorafenib N-oxide | GCN2(Kin.Dom.2,S808G) | EIF2AK4 | 70   |
| Sorafenib N-oxide | GRK1                  | GRK1    | 100  |
| Sorafenib N-oxide | GRK4                  | GRK4    | 100  |
| Sorafenib N-oxide | GRK7                  | GRK7    | 100  |
| Sorafenib N-oxide | GSK3A                 | GSK3A   | 100  |
| Sorafenib N-oxide | GSK3B                 | GSK3B   | 79   |
| Sorafenib N-oxide | HCK                   | HCK     | 8.8  |
| Sorafenib N-oxide | HIPK1                 | HIPK1   | 44   |

|                   |                              |         |      |
|-------------------|------------------------------|---------|------|
| Sorafenib N-oxide | HIPK2                        | HIPK2   | 20   |
| Sorafenib N-oxide | HIPK3                        | HIPK3   | 5.1  |
| Sorafenib N-oxide | HIPK4                        | HIPK4   | 2.3  |
| Sorafenib N-oxide | HPK1                         | MAP4K1  | 6    |
| Sorafenib N-oxide | HUNK                         | HUNK    | 74   |
| Sorafenib N-oxide | ICK                          | ICK     | 100  |
| Sorafenib N-oxide | IGF1R                        | IGF1R   | 97   |
| Sorafenib N-oxide | IKK-alpha                    | CHUK    | 6.5  |
| Sorafenib N-oxide | IKK-beta                     | IKBKB   | 61   |
| Sorafenib N-oxide | IKK-epsilon                  | IKBKE   | 100  |
| Sorafenib N-oxide | INSR                         | INSR    | 83   |
| Sorafenib N-oxide | INSRR                        | INSRR   | 86   |
| Sorafenib N-oxide | IRAK1                        | IRAK1   | 22   |
| Sorafenib N-oxide | IRAK3                        | IRAK3   | 91   |
| Sorafenib N-oxide | IRAK4                        | IRAK4   | 100  |
| Sorafenib N-oxide | ITK                          | ITK     | 100  |
| Sorafenib N-oxide | JAK1(JH1domain-catalytic)    | JAK1    | 50   |
| Sorafenib N-oxide | JAK1(JH2domain-pseudokinase) | JAK1    | 96   |
| Sorafenib N-oxide | JAK2(JH1domain-catalytic)    | JAK2    | 68   |
| Sorafenib N-oxide | JAK3(JH1domain-catalytic)    | JAK3    | 78   |
| Sorafenib N-oxide | JNK1                         | MAPK8   | 13   |
| Sorafenib N-oxide | JNK2                         | MAPK9   | 0.05 |
| Sorafenib N-oxide | JNK3                         | MAPK10  | 4.4  |
| Sorafenib N-oxide | KIT                          | KIT     | 0    |
| Sorafenib N-oxide | KIT(A829P)                   | KIT     | 26   |
| Sorafenib N-oxide | KIT(D816H)                   | KIT     | 17   |
| Sorafenib N-oxide | KIT(D816V)                   | KIT     | 2.6  |
| Sorafenib N-oxide | KIT(L576P)                   | KIT     | 0    |
| Sorafenib N-oxide | KIT(V559D)                   | KIT     | 0    |
| Sorafenib N-oxide | KIT(V559D,T670I)             | KIT     | 0    |
| Sorafenib N-oxide | KIT(V559D,V654A)             | KIT     | 0.45 |
| Sorafenib N-oxide | LATS1                        | LATS1   | 53   |
| Sorafenib N-oxide | LATS2                        | LATS2   | 100  |
| Sorafenib N-oxide | LCK                          | LCK     | 2.5  |
| Sorafenib N-oxide | LIMK1                        | LIMK1   | 8.5  |
| Sorafenib N-oxide | LIMK2                        | LIMK2   | 59   |
| Sorafenib N-oxide | LKB1                         | STK11   | 100  |
| Sorafenib N-oxide | LOK                          | STK10   | 0    |
| Sorafenib N-oxide | LRRK2                        | LRRK2   | 80   |
| Sorafenib N-oxide | LRRK2(G2019S)                | LRRK2   | 64   |
| Sorafenib N-oxide | LTK                          | LTK     | 73   |
| Sorafenib N-oxide | LYN                          | LYN     | 11   |
| Sorafenib N-oxide | LZK                          | MAP3K13 | 68   |
| Sorafenib N-oxide | MAK                          | MAK     | 35   |
| Sorafenib N-oxide | MAP3K1                       | MAP3K1  | 100  |
| Sorafenib N-oxide | MAP3K15                      | MAP3K15 | 80   |
| Sorafenib N-oxide | MAP3K2                       | MAP3K2  | 100  |
| Sorafenib N-oxide | MAP3K3                       | MAP3K3  | 96   |
| Sorafenib N-oxide | MAP3K4                       | MAP3K4  | 93   |
| Sorafenib N-oxide | MAP4K2                       | MAP4K2  | 66   |
| Sorafenib N-oxide | MAP4K3                       | MAP4K3  | 12   |
| Sorafenib N-oxide | MAP4K4                       | MAP4K4  | 0.5  |

|                   |             |          |      |
|-------------------|-------------|----------|------|
| Sorafenib N-oxide | MAP4K5      | MAP4K5   | 0.45 |
| Sorafenib N-oxide | MAPKAPK2    | MAPKAPK2 | 100  |
| Sorafenib N-oxide | MAPKAPK5    | MAPKAPK5 | 100  |
| Sorafenib N-oxide | MARK1       | MARK1    | 100  |
| Sorafenib N-oxide | MARK2       | MARK2    | 87   |
| Sorafenib N-oxide | MARK3       | MARK3    | 86   |
| Sorafenib N-oxide | MARK4       | MARK4    | 100  |
| Sorafenib N-oxide | MAST1       | MAST1    | 100  |
| Sorafenib N-oxide | MEK1        | MAP2K1   | 80   |
| Sorafenib N-oxide | MEK2        | MAP2K2   | 84   |
| Sorafenib N-oxide | MEK3        | MAP2K3   | 71   |
| Sorafenib N-oxide | MEK4        | MAP2K4   | 60   |
| Sorafenib N-oxide | MEK5        | MAP2K5   | 0.1  |
| Sorafenib N-oxide | MEK6        | MAP2K6   | 55   |
| Sorafenib N-oxide | MELK        | MELK     | 65   |
| Sorafenib N-oxide | MERTK       | MERTK    | 2    |
| Sorafenib N-oxide | MET         | MET      | 16   |
| Sorafenib N-oxide | MET(M1250T) | MET      | 16   |
| Sorafenib N-oxide | MET(Y1235D) | MET      | 11   |
| Sorafenib N-oxide | MINK        | MINK1    | 2.4  |
| Sorafenib N-oxide | MKK7        | MAP2K7   | 63   |
| Sorafenib N-oxide | MKNK1       | MKNK1    | 1    |
| Sorafenib N-oxide | MKNK2       | MKNK2    | 0.05 |
| Sorafenib N-oxide | MLCK        | MYLK3    | 2.8  |
| Sorafenib N-oxide | MLK1        | MAP3K9   | 100  |
| Sorafenib N-oxide | MLK2        | MAP3K10  | 88   |
| Sorafenib N-oxide | MLK3        | MAP3K11  | 89   |
| Sorafenib N-oxide | MRCKA       | CDC42BPA | 90   |
| Sorafenib N-oxide | MRCKB       | CDC42BPB | 97   |
| Sorafenib N-oxide | MST1        | STK4     | 42   |
| Sorafenib N-oxide | MST1R       | MST1R    | 30   |
| Sorafenib N-oxide | MST2        | STK3     | 100  |
| Sorafenib N-oxide | MST3        | STK24    | 14   |
| Sorafenib N-oxide | MST4        | MST4     | 49   |
| Sorafenib N-oxide | MTOR        | FRAP1    | 100  |
| Sorafenib N-oxide | MUSK        | MUSK     | 0.2  |
| Sorafenib N-oxide | MYLK        | MYLK     | 100  |
| Sorafenib N-oxide | MYLK2       | MYLK2    | 8.7  |
| Sorafenib N-oxide | MYLK4       | MYLK4    | 100  |
| Sorafenib N-oxide | MYO3A       | MYO3A    | 14   |
| Sorafenib N-oxide | MYO3B       | MYO3B    | 17   |
| Sorafenib N-oxide | NDR1        | STK38    | 100  |
| Sorafenib N-oxide | NDR2        | STK38L   | 100  |
| Sorafenib N-oxide | NEK1        | NEK1     | 84   |
| Sorafenib N-oxide | NEK11       | NEK11    | 100  |
| Sorafenib N-oxide | NEK2        | NEK2     | 71   |
| Sorafenib N-oxide | NEK3        | NEK3     | 100  |
| Sorafenib N-oxide | NEK4        | NEK4     | 93   |
| Sorafenib N-oxide | NEK5        | NEK5     | 100  |
| Sorafenib N-oxide | NEK6        | NEK6     | 100  |
| Sorafenib N-oxide | NEK7        | NEK7     | 100  |
| Sorafenib N-oxide | NEK9        | NEK9     | 35   |

|                   |                       |             |      |
|-------------------|-----------------------|-------------|------|
| Sorafenib N-oxide | NIM1                  | MGC42105    | 100  |
| Sorafenib N-oxide | NLK                   | NLK         | 11   |
| Sorafenib N-oxide | OSR1                  | OXSRI       | 100  |
| Sorafenib N-oxide | p38-alpha             | MAPK14      | 0    |
| Sorafenib N-oxide | p38-beta              | MAPK11      | 0    |
| Sorafenib N-oxide | p38-delta             | MAPK13      | 0.55 |
| Sorafenib N-oxide | p38-gamma             | MAPK12      | 0.1  |
| Sorafenib N-oxide | PAK1                  | PAK1        | 100  |
| Sorafenib N-oxide | PAK2                  | PAK2        | 93   |
| Sorafenib N-oxide | PAK3                  | PAK3        | 43   |
| Sorafenib N-oxide | PAK4                  | PAK4        | 100  |
| Sorafenib N-oxide | PAK6                  | PAK6        | 82   |
| Sorafenib N-oxide | PAK7                  | PAK7        | 82   |
| Sorafenib N-oxide | PCKT1                 | PCKT1       | 19   |
| Sorafenib N-oxide | PCKT2                 | PCKT2       | 7.7  |
| Sorafenib N-oxide | PCKT3                 | PCKT3       | 26   |
| Sorafenib N-oxide | PDGFRA                | PDGFRA      | 0    |
| Sorafenib N-oxide | PDGFRB                | PDGFRB      | 0    |
| Sorafenib N-oxide | PDPK1                 | PDPK1       | 94   |
| Sorafenib N-oxide | PFCDPK1(P.falciparum) | PFB0815w    | 0.15 |
| Sorafenib N-oxide | PFPK5(P.falciparum)   | MAL13P1.279 | 100  |
| Sorafenib N-oxide | PFTAIRE2              | PFTK2       | 9.6  |
| Sorafenib N-oxide | PFTK1                 | PFTK1       | 3.8  |
| Sorafenib N-oxide | PHKG1                 | PHKG1       | 77   |
| Sorafenib N-oxide | PHKG2                 | PHKG2       | 100  |
| Sorafenib N-oxide | PIK3C2B               | PIK3C2B     | 100  |
| Sorafenib N-oxide | PIK3C2G               | PIK3C2G     | 100  |
| Sorafenib N-oxide | PIK3CA                | PIK3CA      | 95   |
| Sorafenib N-oxide | PIK3CA(C420R)         | PIK3CA      | 40   |
| Sorafenib N-oxide | PIK3CA(E542K)         | PIK3CA      | 100  |
| Sorafenib N-oxide | PIK3CA(E545A)         | PIK3CA      | 100  |
| Sorafenib N-oxide | PIK3CA(E545K)         | PIK3CA      | 100  |
| Sorafenib N-oxide | PIK3CA(H1047L)        | PIK3CA      | 98   |
| Sorafenib N-oxide | PIK3CA(H1047Y)        | PIK3CA      | 100  |
| Sorafenib N-oxide | PIK3CA(I800L)         | PIK3CA      | 100  |
| Sorafenib N-oxide | PIK3CA(M1043I)        | PIK3CA      | 83   |
| Sorafenib N-oxide | PIK3CA(Q546K)         | PIK3CA      | 100  |
| Sorafenib N-oxide | PIK3CB                | PIK3CB      | 93   |
| Sorafenib N-oxide | PIK3CD                | PIK3CD      | 100  |
| Sorafenib N-oxide | PIK3CG                | PIK3CG      | 82   |
| Sorafenib N-oxide | PIK4CB                | PI4KB       | 100  |
| Sorafenib N-oxide | PIM1                  | PIM1        | 100  |
| Sorafenib N-oxide | PIM2                  | PIM2        | 100  |
| Sorafenib N-oxide | PIM3                  | PIM3        | 100  |
| Sorafenib N-oxide | PIP5K1A               | PIP5K1A     | 100  |
| Sorafenib N-oxide | PIP5K1C               | PIP5K1C     | 66   |
| Sorafenib N-oxide | PIP5K2B               | PIP4K2B     | 88   |
| Sorafenib N-oxide | PIP5K2C               | PIP4K2C     | 16   |
| Sorafenib N-oxide | PKAC-alpha            | PRKACA      | 100  |
| Sorafenib N-oxide | PKAC-beta             | PRKACB      | 98   |
| Sorafenib N-oxide | PKMYT1                | PKMYT1      | 100  |
| Sorafenib N-oxide | PKN1                  | PKN1        | 97   |

|                   |                               |          |      |
|-------------------|-------------------------------|----------|------|
| Sorafenib N-oxide | PKN2                          | PKN2     | 91   |
| Sorafenib N-oxide | PKNB(M.tuberculosis)          | pknB     | 100  |
| Sorafenib N-oxide | PLK1                          | PLK1     | 100  |
| Sorafenib N-oxide | PLK2                          | PLK2     | 77   |
| Sorafenib N-oxide | PLK3                          | PLK3     | 100  |
| Sorafenib N-oxide | PLK4                          | PLK4     | 5.2  |
| Sorafenib N-oxide | PRKCD                         | PRKCD    | 100  |
| Sorafenib N-oxide | PRKCE                         | PRKCE    | 100  |
| Sorafenib N-oxide | PRKCH                         | PRKCH    | 84   |
| Sorafenib N-oxide | PRKCI                         | PRKCI    | 100  |
| Sorafenib N-oxide | PRKCQ                         | PRKCQ    | 80   |
| Sorafenib N-oxide | PRKD1                         | PRKD1    | 63   |
| Sorafenib N-oxide | PRKD2                         | PRKD2    | 83   |
| Sorafenib N-oxide | PRKD3                         | PRKD3    | 83   |
| Sorafenib N-oxide | PRKG1                         | PRKG1    | 98   |
| Sorafenib N-oxide | PRKG2                         | PRKG2    | 100  |
| Sorafenib N-oxide | PRKR                          | EIF2AK2  | 58   |
| Sorafenib N-oxide | PRKX                          | PRKX     | 100  |
| Sorafenib N-oxide | PRP4                          | PRPF4B   | 99   |
| Sorafenib N-oxide | PYK2                          | PTK2B    | 91   |
| Sorafenib N-oxide | QSK                           | KIAA0999 | 100  |
| Sorafenib N-oxide | RAF1                          | RAF1     | 0.45 |
| Sorafenib N-oxide | RET                           | RET      | 0    |
| Sorafenib N-oxide | RET(M918T)                    | RET      | 0    |
| Sorafenib N-oxide | RET(V804L)                    | RET      | 0    |
| Sorafenib N-oxide | RET(V804M)                    | RET      | 0    |
| Sorafenib N-oxide | RIOK1                         | RIOK1    | 100  |
| Sorafenib N-oxide | RIOK2                         | RIOK2    | 42   |
| Sorafenib N-oxide | RIOK3                         | RIOK3    | 73   |
| Sorafenib N-oxide | RIPK1                         | RIPK1    | 87   |
| Sorafenib N-oxide | RIPK2                         | RIPK2    | 9.8  |
| Sorafenib N-oxide | RIPK4                         | RIPK4    | 100  |
| Sorafenib N-oxide | RIPK5                         | DSTKY    | 68   |
| Sorafenib N-oxide | ROCK1                         | ROCK1    | 23   |
| Sorafenib N-oxide | ROCK2                         | ROCK2    | 82   |
| Sorafenib N-oxide | ROS1                          | ROS1     | 73   |
| Sorafenib N-oxide | RPS6KA4(Kin.Dom.1-N-terminal) | RPS6KA4  | 13   |
| Sorafenib N-oxide | RPS6KA4(Kin.Dom.2-C-terminal) | RPS6KA4  | 98   |
| Sorafenib N-oxide | RPS6KA5(Kin.Dom.1-N-terminal) | RPS6KA5  | 59   |
| Sorafenib N-oxide | RPS6KA5(Kin.Dom.2-C-terminal) | RPS6KA5  | 81   |
| Sorafenib N-oxide | RSK1(Kin.Dom.1-N-terminal)    | RPS6KA1  | 91   |
| Sorafenib N-oxide | RSK1(Kin.Dom.2-C-terminal)    | RPS6KA1  | 58   |
| Sorafenib N-oxide | RSK2(Kin.Dom.1-N-terminal)    | RPS6KA3  | 52   |
| Sorafenib N-oxide | RSK3(Kin.Dom.1-N-terminal)    | RPS6KA2  | 43   |
| Sorafenib N-oxide | RSK3(Kin.Dom.2-C-terminal)    | RPS6KA2  | 42   |
| Sorafenib N-oxide | RSK4(Kin.Dom.1-N-terminal)    | RPS6KA6  | 97   |
| Sorafenib N-oxide | RSK4(Kin.Dom.2-C-terminal)    | RPS6KA6  | 6.4  |
| Sorafenib N-oxide | S6K1                          | RPS6KB1  | 42   |
| Sorafenib N-oxide | SBK1                          | SBK1     | 100  |
| Sorafenib N-oxide | SgK110                        | SgK110   | 100  |
| Sorafenib N-oxide | SGK3                          | SGK3     | 42   |
| Sorafenib N-oxide | SIK                           | SIK1     | 66   |



|                   |                              |        |      |
|-------------------|------------------------------|--------|------|
| Sorafenib N-oxide | SIK2                         | SIK2   | 66   |
| Sorafenib N-oxide | SLK                          | SLK    | 9.4  |
| Sorafenib N-oxide | SNARK                        | NUAK2  | 85   |
| Sorafenib N-oxide | SNRK                         | SNRK   | 95   |
| Sorafenib N-oxide | SRC                          | SRC    | 53   |
| Sorafenib N-oxide | SRMS                         | SRMS   | 10   |
| Sorafenib N-oxide | SRPK1                        | SRPK1  | 100  |
| Sorafenib N-oxide | SRPK2                        | SRPK2  | 73   |
| Sorafenib N-oxide | SRPK3                        | SRPK3  | 86   |
| Sorafenib N-oxide | STK16                        | STK16  | 81   |
| Sorafenib N-oxide | STK33                        | STK33  | 6.9  |
| Sorafenib N-oxide | STK35                        | STK35  | 40   |
| Sorafenib N-oxide | STK36                        | STK36  | 26   |
| Sorafenib N-oxide | STK39                        | STK39  | 87   |
| Sorafenib N-oxide | SYK                          | SYK    | 89   |
| Sorafenib N-oxide | TAK1                         | MAP3K7 | 2.9  |
| Sorafenib N-oxide | TAOK1                        | TAOK1  | 11   |
| Sorafenib N-oxide | TAOK2                        | TAOK2  | 8    |
| Sorafenib N-oxide | TAOK3                        | TAOK3  | 0.4  |
| Sorafenib N-oxide | TBK1                         | TBK1   | 100  |
| Sorafenib N-oxide | TEC                          | TEC    | 68   |
| Sorafenib N-oxide | TESK1                        | TESK1  | 55   |
| Sorafenib N-oxide | TGFBR1                       | TGFBR1 | 100  |
| Sorafenib N-oxide | TGFBR2                       | TGFBR2 | 3.1  |
| Sorafenib N-oxide | TIE1                         | TIE1   | 0.3  |
| Sorafenib N-oxide | TIE2                         | TEK    | 3.5  |
| Sorafenib N-oxide | TLK1                         | TLK1   | 60   |
| Sorafenib N-oxide | TLK2                         | TLK2   | 100  |
| Sorafenib N-oxide | TNIK                         | TNIK   | 3.9  |
| Sorafenib N-oxide | TNK1                         | TNK1   | 6.6  |
| Sorafenib N-oxide | TNK2                         | TNK2   | 100  |
| Sorafenib N-oxide | TNNI3K                       | TNNI3K | 2.4  |
| Sorafenib N-oxide | TRKA                         | NTRK1  | 4    |
| Sorafenib N-oxide | TRKB                         | NTRK2  | 2.4  |
| Sorafenib N-oxide | TRKC                         | NTRK3  | 0.35 |
| Sorafenib N-oxide | TRPM6                        | TRPM6  | 100  |
| Sorafenib N-oxide | TSSK1B                       | TSSK1B | 100  |
| Sorafenib N-oxide | TTK                          | TTK    | 9    |
| Sorafenib N-oxide | TXK                          | TXK    | 78   |
| Sorafenib N-oxide | TYK2(JH1domain-catalytic)    | TYK2   | 100  |
| Sorafenib N-oxide | TYK2(JH2domain-pseudokinase) | TYK2   | 99   |
| Sorafenib N-oxide | TYRO3                        | TYRO3  | 100  |
| Sorafenib N-oxide | ULK1                         | ULK1   | 99   |
| Sorafenib N-oxide | ULK2                         | ULK2   | 75   |
| Sorafenib N-oxide | ULK3                         | ULK3   | 82   |
| Sorafenib N-oxide | VEGFR2                       | KDR    | 0.4  |
| Sorafenib N-oxide | VRK2                         | VRK2   | 100  |
| Sorafenib N-oxide | WEE1                         | WEE1   | 100  |
| Sorafenib N-oxide | WEE2                         | WEE2   | 94   |
| Sorafenib N-oxide | YANK1                        | STK32A | 92   |
| Sorafenib N-oxide | YANK2                        | STK32B | 100  |
| Sorafenib N-oxide | YANK3                        | STK32C | 87   |

|                   |       |       |      |
|-------------------|-------|-------|------|
| Sorafenib N-oxide | YES   | YES1  | 68   |
| Sorafenib N-oxide | YSK1  | STK25 | 32   |
| Sorafenib N-oxide | YSK4  | YSK4  | 0.1  |
| Sorafenib N-oxide | ZAK   | ZAK   | 0.85 |
| Sorafenib N-oxide | ZAP70 | ZAP70 | 77   |
